# Supplementary material for: Research Note—Why Following Friends Can Hurt You: An Exploratory Investigation of the Effects of Envy on Social Networking Sites among College-Age Users
Source: Atypon-hosted journal article supplement (doi:10.1287/isre.2015.0588), 2015-09-01
Supplement: isre.2015.0588-sm-appendix.pdf [file isre.2015.0588-sm-appendix.pdf]

# **Research Note – Why Following Friends Can Hurt You: An Exploratory Investigation of the Effects of Envy on Social Networking Sites among College-Age Users**

## **Hanna Krasnova**

Institute of Information Systems, Universität Bern  
Engehaldenstr. 8, 3012 Bern, Switzerland  
Phone: +41 31 631 49 67  
hanna.krasnova@iwi.unibe.ch

## **Thomas Widjaja**

Chair of Information Systems, Technische Universität Darmstadt  
Hochschulstraße 1, 64289 Darmstadt, Germany  
Phone: +49 6151 16-7358  
Fax: +49 6151 16-5162  
Widjaja@is.tu-darmstadt.de

## **Peter Buxmann**

Chair of Information Systems, Technische Universität Darmstadt  
Hochschulstraße 1, 64289 Darmstadt, Germany  
Phone: +49 6151 16-2663  
Fax: +49 6151 16-5162  
buxmann@is.tu-darmstadt.de

## **Helena Wenninger**

Chair of Information Systems, Technische Universität Darmstadt  
Hochschulstraße 1, 64289 Darmstadt, Germany  
Phone: +49 6151 16-7357  
Fax: +49 6151 16-5162  
wenninger@is.tu-darmstadt.de

## **Izak Benbasat**

University of British Columbia  
The Sauder School of Business  
Office Henry Angus 681, Canada  
Phone: + 604 822-8396  
izak.benbasat@sauder.ubc.ca

## Appendix A

**Table A.1:** Association between Envy and Self-directed SWB-related Variables: Overview of Selected Studies

| SWB-related Variables (Relationship) | Supporting Studies                                                                                                 |
|--------------------------------------|--------------------------------------------------------------------------------------------------------------------|
| Depression (+)                       | Cohen-Charash (2009)<br>Gold (1996)<br>Salovey and Rodin (1984)<br>Silver and Sabini (1978)<br>Smith et al. (1999) |
| Anxiety; tension (+)                 | Cohen-Charash (2009)<br>Gold (1996)<br>Salovey and Rodin (1984)                                                    |
| Inferiority (+)                      | Gold (1996)<br>Parrott and Smith (1993)<br>Smith et al. (1999)<br>Smith et al. (1994)                              |
| Self-esteem (-)                      | Smith et al. (1999)                                                                                                |
| Neuroticism (+)                      | Smith et al. (1999)                                                                                                |
| Resentment (+)                       | Parrott and Smith (1993)<br>Smith et al. (1999)                                                                    |
| Frustration (+)                      | van de Ven et al. (2009)                                                                                           |
| Self-regulatory depletion (+)        | Hill et al. (2011)                                                                                                 |
| Life satisfaction (-)                | Smith et al. (1999)                                                                                                |
| Relational satisfaction (-)          | Yoshimura (2010)                                                                                                   |
| Happiness (-)                        | Smith et al. (1999)                                                                                                |
| Mood disturbance (+)                 | Cohen-Charash (2009)                                                                                               |
| Phobic anxiety (+)                   | Gold (1996)                                                                                                        |
| Somatization (+)                     | Gold (1996)                                                                                                        |
| Obsessive compulsive disorder (+)    | Gold (1996)                                                                                                        |
| Disapproval of feelings (+)          | Parrott and Smith (1993)                                                                                           |
| Longing (+)                          | Parrott and Smith (1993)                                                                                           |

**Table A.2:** Envy-Coping Strategies / Responses: Overview of Selected Studies

| Categories of Envy-Coping Strategies / Responses                                                             | Supporting Studies                                                                                                                                                                                                     |
|--------------------------------------------------------------------------------------------------------------|------------------------------------------------------------------------------------------------------------------------------------------------------------------------------------------------------------------------|
| Hurting the target (e.g. reputation, performance; social undermining; degradation of the target; belittling) | Cohen-Charash (2009)<br>van de Ven et al. (2009)<br>Duffy et al. (2012)<br>Silver and Sabini (1978)<br>Salovey and Rodin (1984)<br>Schaubroeck and Lam (2004)<br>Moran and Schweitzer (2008)<br>Gino and Pierce (2009) |
| Self-enhancement (including self-bolstering; matching and social differentiation)                            | Yoshimura (2010)<br>Salovey and Rodin (1988)<br>Van de Ven et al. (2011)                                                                                                                                               |
| Improving (position of self; job performance)                                                                | Cohen-Charash (2009)<br>Schaubroeck and Lam (2004)<br>Parrott and Smith (1993)                                                                                                                                         |
| Avoidance; not desiring friendship with the target                                                           | Yoshimura (2010)<br>Salovey and Rodin (1984)                                                                                                                                                                           |
| Deception; dishonesty                                                                                        | Moran and Schweitzer (2008)<br>Gino and Pierce (2009)                                                                                                                                                                  |
| Social loafing                                                                                               | Duffy and Shaw (2000)                                                                                                                                                                                                  |
| Absenteeism                                                                                                  | Duffy and Shaw (2000)                                                                                                                                                                                                  |
| Creating negative work atmosphere                                                                            | Cohen-Charash (2009)                                                                                                                                                                                                   |
| Moral disengagement                                                                                          | Duffy et al. (2012)                                                                                                                                                                                                    |
| Selective ignoring                                                                                           | Salovey and Rodin (1988)                                                                                                                                                                                               |
| Self-reliance                                                                                                | Salovey and Rodin (1988)                                                                                                                                                                                               |
| Calm communication                                                                                           | Yoshimura (2010)                                                                                                                                                                                                       |
| Developing positive relationship with the target                                                             | Cohen-Charash (2009)                                                                                                                                                                                                   |

## Appendix B

**Table B.1:** Construct Operationalization and Descriptive Statistics

| <i>Item</i>                                                                                                                                                                                              | <i>Mean</i> | <i>SD</i> | <i>Load-<br/>ing*</i> | <i>AVE</i> | <i>CR</i> | <i>CA</i> |
|----------------------------------------------------------------------------------------------------------------------------------------------------------------------------------------------------------|-------------|-----------|-----------------------|------------|-----------|-----------|
| <b>Envy on an SNS</b> (based on Vecchio, 1995; 2000); Scale: 1=(almost) never; 7=very often.                                                                                                             |             |           |                       |            |           |           |
| <i>When using Facebook, how often are you thinking that:</i>                                                                                                                                             |             |           |                       |            |           |           |
| Most of my Facebook friends have it better than I do.                                                                                                                                                    | 2.029       | 1.276     | 0.816                 | 0.572      | 0.888     | 0.848     |
| The posts of my Facebook friends get more attention (e.g. "likes", comments etc.) than mine.                                                                                                             | 3.116       | 1.747     | 0.604                 |            |           |           |
| I don't know why, but I usually seem to feel myself as an underdog on Facebook.                                                                                                                          | 1.900       | 1.277     | 0.806                 |            |           |           |
| It is somewhat annoying to see on Facebook how successful some of my Facebook friends are.                                                                                                               | 2.204       | 1.387     | 0.829                 |            |           |           |
| It is somewhat disturbing to see how popular some others are on Facebook.                                                                                                                                | 2.204       | 1.483     | 0.766                 |            |           |           |
| It is somehow disturbing when I see on Facebook how much traveling others can afford.                                                                                                                    | 2.542       | 1.584     | 0.691                 |            |           |           |
| <b>Social Information Consumption on an SNS</b> (based on Koroleva et al., 2011); Scale: 1=never; 7=several times a day.                                                                                 |             |           |                       |            |           |           |
| <i>On Facebook, how often do you?</i>                                                                                                                                                                    |             |           |                       |            |           |           |
| ...look through the News Feed.                                                                                                                                                                           | 5.617       | 1.722     | 0.744                 | 0.646      | 0.880     | 0.818     |
| ...follow what your friends are sharing.                                                                                                                                                                 | 4.943       | 1.687     | 0.812                 |            |           |           |
| ...click through the content your friends have shared (as photos, videos).                                                                                                                               | 4.597       | 1.566     | 0.838                 |            |           |           |
| ...browse the photos your friends shared.                                                                                                                                                                | 4.114       | 1.437     | 0.819                 |            |           |           |
| <b>Social information sharing on an SNS</b> (based on Koroleva et al., 2011); Scale:1=never; 7=several times a day.                                                                                      |             |           |                       |            |           |           |
| <i>On Facebook, how often do you?</i>                                                                                                                                                                    |             |           |                       |            |           |           |
| ...react to posts of your friends (e.g., by commenting, "liking" etc.).                                                                                                                                  | 4.291       | 1.531     | 0.831                 | 0.736      | 0.893     | 0.821     |
| ...post something (e.g., status update, photos, links etc.).                                                                                                                                             | 2.923       | 1.189     | 0.868                 |            |           |           |
| ...keep your friends updated about yourself.                                                                                                                                                             | 2.874       | 1.434     | 0.875                 |            |           |           |
| <b>Affective Well-being</b> (operationalized as "Sadness on an SNS", based on Watson et al., 1988, and Watson and Clark, 1994); Scale: 1=(almost) never; 5=always; (items reversed prior to evaluation). |             |           |                       |            |           |           |
| <i>In the following you find a list of feelings people have when using Facebook. When you think about how you feel when using Facebook, to what extent do you feel:</i>                                  |             |           |                       |            |           |           |
| ...sad (reversed)                                                                                                                                                                                        | 6.238       | 0.771     | 0.790                 | 0.703      | 0.922     | 0.894     |
| ...blue (reversed)                                                                                                                                                                                       | 6.220       | 0.873     | 0.843                 |            |           |           |
| ...downhearted (reversed)                                                                                                                                                                                | 6.320       | 0.812     | 0.855                 |            |           |           |
| ...alone (reversed)                                                                                                                                                                                      | 6.139       | 0.930     | 0.849                 |            |           |           |
| ...lonely (reversed)                                                                                                                                                                                     | 6.126       | 0.945     | 0.854                 |            |           |           |
| <b>Cognitive Well-being</b> (operationalized as "Satisfaction with life", based on Diener et al., 1985); Scale: 1=strongly disagree; 7=strongly agree.                                                   |             |           |                       |            |           |           |
| <i>To what extent do you agree with the following statements?</i>                                                                                                                                        |             |           |                       |            |           |           |
| In most ways my life is close to my ideal.                                                                                                                                                               | 4.646       | 1.403     | 0.867                 | 0.754      | 0.902     | 0.837     |
| The conditions of my life are excellent.                                                                                                                                                                 | 4.851       | 1.419     | 0.824                 |            |           |           |
| I am satisfied with my life.                                                                                                                                                                             | 5.354       | 1.300     | 0.912                 |            |           |           |
| <b>Self-enhancement on an SNS</b> (Krasnova et al., 2010; Kim and Lee, 2011); Scale: 1= strongly disagree; 7= strongly agree; additionally "not applicable (I never post)" was available.                |             |           |                       |            |           |           |
| <i>In my communication on Facebook, I tend to...</i>                                                                                                                                                     |             |           |                       |            |           |           |
| ...post only things showing my best side.                                                                                                                                                                | 4.369       | 4.369     | 0.848                 | 0.743      | 0.897     | 0.828     |
| ...share posts/photos showing me as a happy person.                                                                                                                                                      | 4.570       | 4.570     | 0.904                 |            |           |           |
| ...show positive feelings when posting something.                                                                                                                                                        | 4.662       | 4.662     | 0.832                 |            |           |           |
| <b>Dispositional Envy</b> (Smith et al., 1999); Scale:1= strongly agree, 7= strongly disagree.                                                                                                           |             |           |                       |            |           |           |
| <i>To what extent to you agree with the following statements?</i>                                                                                                                                        |             |           |                       |            |           |           |
| I feel envy every day.                                                                                                                                                                                   | 2.012       | 1.272     | 0.830                 | 0.680      | 0.894     | 0.843     |

|                                                                                              |       |       |       |       |       |       |
|----------------------------------------------------------------------------------------------|-------|-------|-------|-------|-------|-------|
| The bitter truth is that I generally feel inferior to others.                                | 2.236 | 1.429 | 0.829 |       |       |       |
| Feelings of envy constantly torment me.                                                      | 2.039 | 1.226 | 0.866 |       |       |       |
| I am troubled by feelings of inadequacy.                                                     | 2.933 | 1.588 | 0.770 |       |       |       |
| <b>Extraversion</b> (Rammstedt and John, 2007); Scale:1=strongly agree, 7=strongly disagree. |       |       |       |       |       |       |
| <i>I see myself as someone who...</i>                                                        |       |       |       |       |       |       |
| ...is reserved.                                                                              | 4.112 | 1.585 | 0.931 | 0.857 | 0.923 | 0.834 |
| ...is outgoing, sociable (Reversed).                                                         | 4.580 | 1.417 | 0.921 |       |       |       |
| <b>Neuroticism</b> (Rammstedt and John, 2007); Scale:1=strongly agree, 7=strongly disagree.  |       |       |       |       |       |       |
| <i>I see myself as someone who...</i>                                                        |       |       |       |       |       |       |
| ...is relaxed, handles stress well (Reversed).                                               | 3.823 | 1.445 | 0.862 | 0.750 | 0.857 | 0.666 |
| ...gets nervous easily.                                                                      | 3.817 | 1.543 | 0.870 |       |       |       |

AVE=Average Variance Extracted; CR=Composite Reliability; CA=Cronbach's Alpha;

\*All item loadings were highly (i.e. at 1% or lower) significant.

## Appendix C

**Table C.1: Cross Loadings**

|                                                       | AWB          | Age          | CWB          | DE           | ENV          | Extra        | Gender       | Neuro        | NuFr         | SE           | SIC          | SIS          |
|-------------------------------------------------------|--------------|--------------|--------------|--------------|--------------|--------------|--------------|--------------|--------------|--------------|--------------|--------------|
| Affective well-being (AWB) item 1                     | <b>0.790</b> | 0.067        | 0.285        | -0.434       | -0.471       | 0.063        | 0.118        | -0.271       | -0.042       | -0.117       | -0.193       | -0.142       |
| Affective well-being (AWB) item 2                     | <b>0.843</b> | 0.137        | 0.260        | -0.467       | -0.508       | 0.139        | 0.104        | -0.348       | 0.013        | -0.089       | -0.110       | -0.087       |
| Affective well-being (AWB) item 3                     | <b>0.855</b> | 0.126        | 0.270        | -0.509       | -0.579       | 0.150        | 0.056        | -0.280       | -0.028       | -0.111       | -0.125       | -0.095       |
| Affective well-being (AWB) item 4                     | <b>0.849</b> | 0.150        | 0.296        | -0.470       | -0.498       | 0.167        | 0.056        | -0.326       | 0.002        | -0.067       | -0.200       | -0.099       |
| Affective well-being (AWB) item 5                     | <b>0.854</b> | 0.117        | 0.286        | -0.472       | -0.483       | 0.181        | 0.043        | -0.326       | 0.009        | -0.073       | -0.165       | -0.070       |
| Age                                                   | 0.144        | <b>1.000</b> | -0.009       | -0.107       | -0.096       | 0.061        | 0.095        | -0.076       | -0.137       | -0.088       | -0.049       | 0.033        |
| Cognitive well-being (CWB) item 1                     | 0.265        | 0.030        | <b>0.867</b> | -0.357       | -0.304       | 0.160        | 0.032        | -0.340       | 0.043        | 0.050        | -0.007       | -0.015       |
| Cognitive well-being (CWB) item 2                     | 0.206        | -0.036       | <b>0.824</b> | -0.293       | -0.261       | 0.132        | 0.051        | -0.315       | 0.112        | 0.104        | -0.014       | -0.062       |
| Cognitive well-being (CWB) item 3                     | 0.373        | -0.018       | <b>0.912</b> | -0.462       | -0.366       | 0.208        | -0.002       | -0.406       | 0.098        | 0.022        | -0.047       | -0.034       |
| Dispositional envy (DE) item 1                        | -0.440       | -0.064       | -0.326       | <b>0.830</b> | 0.485        | -0.097       | -0.010       | 0.301        | -0.001       | 0.093        | 0.040        | 0.014        |
| Dispositional envy (DE) item 2                        | -0.489       | -0.114       | -0.398       | <b>0.829</b> | 0.440        | -0.176       | -0.149       | 0.450        | -0.067       | 0.111        | 0.037        | 0.011        |
| Dispositional envy (DE) item 3                        | -0.443       | -0.120       | -0.333       | <b>0.866</b> | 0.504        | -0.068       | -0.094       | 0.351        | 0.019        | 0.149        | 0.083        | 0.018        |
| Dispositional envy (DE) item 4                        | -0.494       | -0.050       | -0.393       | <b>0.770</b> | 0.408        | -0.177       | -0.057       | 0.430        | -0.025       | 0.064        | 0.080        | 0.031        |
| Envy on an SNS (ENV) item 1                           | -0.499       | -0.050       | -0.363       | 0.455        | <b>0.816</b> | -0.155       | -0.088       | 0.229        | -0.015       | 0.142        | 0.183        | 0.061        |
| Envy on an SNS (ENV) item 2                           | -0.359       | -0.044       | -0.187       | 0.263        | <b>0.604</b> | -0.132       | -0.004       | 0.150        | 0.008        | 0.246        | 0.164        | 0.087        |
| Envy on an SNS (ENV) item 3                           | -0.565       | -0.085       | -0.305       | 0.548        | <b>0.806</b> | -0.094       | -0.079       | 0.315        | -0.056       | 0.144        | 0.138        | 0.049        |
| Envy on an SNS (ENV) item 4                           | -0.474       | -0.043       | -0.299       | 0.460        | <b>0.829</b> | -0.071       | -0.041       | 0.231        | 0.038        | 0.180        | 0.200        | 0.166        |
| Envy on an SNS (ENV) item 5                           | -0.452       | -0.149       | -0.222       | 0.411        | <b>0.766</b> | -0.098       | -0.027       | 0.243        | 0.058        | 0.226        | 0.183        | 0.129        |
| Envy on an SNS (ENV) item 6                           | -0.368       | -0.062       | -0.238       | 0.344        | <b>0.691</b> | -0.124       | -0.083       | 0.177        | -0.010       | 0.144        | 0.187        | 0.138        |
| Extraversion (Extra) item 1                           | 0.188        | 0.074        | 0.191        | -0.164       | -0.136       | <b>0.931</b> | -0.103       | -0.290       | 0.312        | 0.046        | 0.088        | 0.111        |
| Extraversion (Extra) item 2                           | 0.122        | 0.037        | 0.171        | -0.116       | -0.134       | <b>0.921</b> | -0.124       | -0.239       | 0.307        | 0.140        | 0.136        | 0.135        |
| Gender                                                | 0.089        | 0.095        | 0.028        | -0.093       | -0.074       | -0.122       | <b>1.000</b> | -0.189       | 0.017        | -0.130       | 0.002        | 0.074        |
| Neuroticism (Neuro) item 1                            | -0.319       | -0.031       | -0.353       | 0.380        | 0.256        | -0.127       | -0.232       | <b>0.862</b> | -0.080       | 0.054        | 0.059        | 0.026        |
| Neuroticism (Neuro) item 2                            | -0.321       | -0.100       | -0.359       | 0.414        | 0.269        | -0.366       | -0.098       | <b>0.870</b> | -0.142       | 0.084        | 0.031        | 0.012        |
| Number of friends on an SNS (NuFr)                    | -0.011       | -0.137       | 0.097        | -0.020       | 0.002        | 0.334        | 0.017        | -0.129       | <b>1.000</b> | 0.209        | 0.274        | 0.251        |
| Self-enhancement on an SNS (SE) item 1                | -0.174       | -0.081       | 0.025        | 0.156        | 0.251        | 0.057        | -0.095       | 0.085        | 0.184        | <b>0.848</b> | 0.304        | 0.208        |
| Self-enhancement on an SNS (SE) item 2                | -0.087       | -0.097       | 0.061        | 0.099        | 0.207        | 0.083        | -0.151       | 0.062        | 0.198        | <b>0.904</b> | 0.278        | 0.267        |
| Self-enhancement on an SNS (SE) item 3                | -0.009       | -0.042       | 0.082        | 0.075        | 0.132        | 0.123        | -0.084       | 0.060        | 0.154        | <b>0.832</b> | 0.207        | 0.232        |
| Social information consumption on an SNS (SIC) item 1 | -0.117       | -0.103       | -0.049       | 0.041        | 0.167        | -0.003       | -0.015       | 0.048        | 0.213        | 0.255        | <b>0.744</b> | 0.424        |
| Social information consumption on an SNS (SIC) item 2 | -0.141       | 0.064        | -0.026       | 0.028        | 0.179        | 0.094        | -0.036       | 0.029        | 0.171        | 0.268        | <b>0.812</b> | 0.487        |
| Social information consumption on an SNS (SIC) item 3 | -0.164       | 0.001        | 0.000        | 0.067        | 0.166        | 0.099        | 0.051        | 0.038        | 0.267        | 0.259        | <b>0.838</b> | 0.464        |
| Social information consumption on an SNS (SIC) item 4 | -0.174       | -0.108       | -0.018       | 0.090        | 0.218        | 0.173        | 0.008        | 0.051        | 0.233        | 0.218        | <b>0.819</b> | 0.371        |
| Social information sharing on an SNS (SIS) item 1     | -0.090       | -0.041       | -0.001       | 0.019        | 0.096        | 0.127        | 0.013        | 0.010        | 0.268        | 0.255        | 0.519        | <b>0.831</b> |
| Social information sharing on an SNS (SIS) item 2     | -0.068       | 0.134        | -0.081       | 0.013        | 0.123        | 0.138        | 0.116        | 0.014        | 0.188        | 0.213        | 0.409        | <b>0.868</b> |
| Social information sharing on an SNS (SIS) item 3     | -0.138       | 0.001        | -0.027       | 0.024        | 0.128        | 0.080        | 0.065        | 0.032        | 0.190        | 0.237        | 0.453        | <b>0.875</b> |

*Note: Affective well-being was operationalized as "Sadness on an SNS" (items were reversed prior to evaluation).*

**Table C.2:** Square root of Average Variance Extracted (Diagonal Elements) and Correlations Between Latent Variables (Off-Diagonal Elements)

| Construct                                      | AWB    | Age    | CWB    | DE     | ENV    | Extra  | Gender | Neuro  | NuFr  | SE    | SIC   | SIS   |
|------------------------------------------------|--------|--------|--------|--------|--------|--------|--------|--------|-------|-------|-------|-------|
| Affective well-being (AWB)                     | 0.839  |        |        |        |        |        |        |        |       |       |       |       |
| Age                                            | 0.144  | 1.000  |        |        |        |        |        |        |       |       |       |       |
| Cognitive well-being (CWB)                     | 0.333  | -0.009 | 0.868  |        |        |        |        |        |       |       |       |       |
| Dispositional envy (DE)                        | -0.562 | -0.107 | -0.435 | 0.825  |        |        |        |        |       |       |       |       |
| Envy on an SNS (ENV)                           | -0.607 | -0.096 | -0.362 | 0.559  | 0.756  |        |        |        |       |       |       |       |
| Extraversion (Extra)                           | 0.168  | 0.061  | 0.196  | -0.152 | -0.146 | 0.926  |        |        |       |       |       |       |
| Gender                                         | 0.089  | 0.095  | 0.028  | -0.093 | -0.074 | -0.122 | 1.000  |        |       |       |       |       |
| Neuroticism (Neuro)                            | -0.370 | -0.076 | -0.411 | 0.459  | 0.303  | -0.287 | -0.189 | 0.866  |       |       |       |       |
| Number of friends on an SNS (NuFr)             | -0.011 | -0.137 | 0.097  | -0.020 | 0.002  | 0.334  | 0.017  | -0.129 | 1.000 |       |       |       |
| Self-enhancement on an SNS (SE)                | -0.109 | -0.088 | 0.063  | 0.129  | 0.232  | 0.099  | -0.130 | 0.080  | 0.209 | 0.862 |       |       |
| Social information consumption on an SNS (SIC) | -0.187 | -0.049 | -0.028 | 0.073  | 0.230  | 0.120  | 0.002  | 0.052  | 0.274 | 0.308 | 0.804 |       |
| Social information sharing on an SNS (SIS)     | -0.117 | 0.033  | -0.041 | 0.022  | 0.135  | 0.132  | 0.074  | 0.022  | 0.251 | 0.274 | 0.538 | 0.858 |

**Table C.3:** Heterotrait-monotrait (HTMT) results according to Henseler et al. (2014)

| Construct                                      | AWB    | Age    | CWB    | DE     | ENV    | Extra  | Gender | Neuro  | NuFr  | SE    | SIC   | SIS |
|------------------------------------------------|--------|--------|--------|--------|--------|--------|--------|--------|-------|-------|-------|-----|
| Affective well-being (AWB)                     |        |        |        |        |        |        |        |        |       |       |       |     |
| Age                                            | 0.151  |        |        |        |        |        |        |        |       |       |       |     |
| Cognitive well-being (CWB)                     | 0.375  | -0.010 |        |        |        |        |        |        |       |       |       |     |
| Dispositional envy (DE)                        | -0.651 | -0.115 | -0.513 |        |        |        |        |        |       |       |       |     |
| Envy on an SNS (ENV)                           | -0.688 | -0.104 | -0.418 | 0.646  |        |        |        |        |       |       |       |     |
| Extraversion (Extra)                           | 0.192  | 0.066  | 0.229  | -0.186 | -0.178 |        |        |        |       |       |       |     |
| Gender                                         | 0.095  | 0.095  | 0.034  | -0.102 | -0.077 | -0.134 |        |        |       |       |       |     |
| Neuroticism (Neuro)                            | -0.479 | -0.092 | -0.545 | 0.620  | 0.396  | -0.381 | -0.233 |        |       |       |       |     |
| Number of friends on an SNS (NuFr)             | -0.012 | -0.137 | 0.106  | -0.025 | 0.005  | 0.366  | 0.017  | -0.157 |       |       |       |     |
| Self-enhancement on an SNS (SE)                | -0.121 | -0.093 | 0.083  | 0.150  | 0.281  | 0.124  | -0.140 | 0.107  | 0.228 |       |       |     |
| Social information consumption on an SNS (SIC) | -0.219 | -0.050 | -0.032 | 0.085  | 0.277  | 0.138  | 0.003  | 0.070  | 0.304 | 0.374 |       |     |
| Social information sharing on an SNS (SIS)     | -0.135 | 0.040  | -0.053 | 0.027  | 0.167  | 0.162  | 0.083  | 0.030  | 0.277 | 0.331 | 0.661 |     |

**Table C.4:** Path Coefficients and Significance Levels for Control Variables

| <b>Control Variable → Construct</b>  | <b>Envy on an SNS</b> | <b>Cognitive Well-being</b> | <b>Affective Well-being</b> | <b>Self-enhancement on an SNS</b> |
|--------------------------------------|-----------------------|-----------------------------|-----------------------------|-----------------------------------|
| Social information sharing on an SNS | 0.045                 | -0.009                      | -0.044                      | <b>0.218**</b>                    |
| Age                                  | -0.026                | -0.053                      | <b>0.071**</b>              | -0.048                            |
| Dispositional envy                   | <b>0.516**</b>        | -                           | -                           | -                                 |
| Extraversion                         | <b>-0.085**</b>       | 0.053                       | 0.051                       | 0.046                             |
| Gender                               | -0.033                | -0.041                      | 0.017                       | <b>-0.120**</b>                   |
| Neuroticism                          | 0.021                 | <b>-0.324**</b>             | <b>-0.189**</b>             | 0.023                             |
| Number of friends on an SNS          | -0.020                | 0.034                       | -0.030                      | <b>0.137**</b>                    |

Note: "Affective well-being" was operationalized as "Sadness on an SNS" (items were reversed prior to evaluation).  
Significance: \* at 5%; \*\* at 1% or lower

## Appendix D

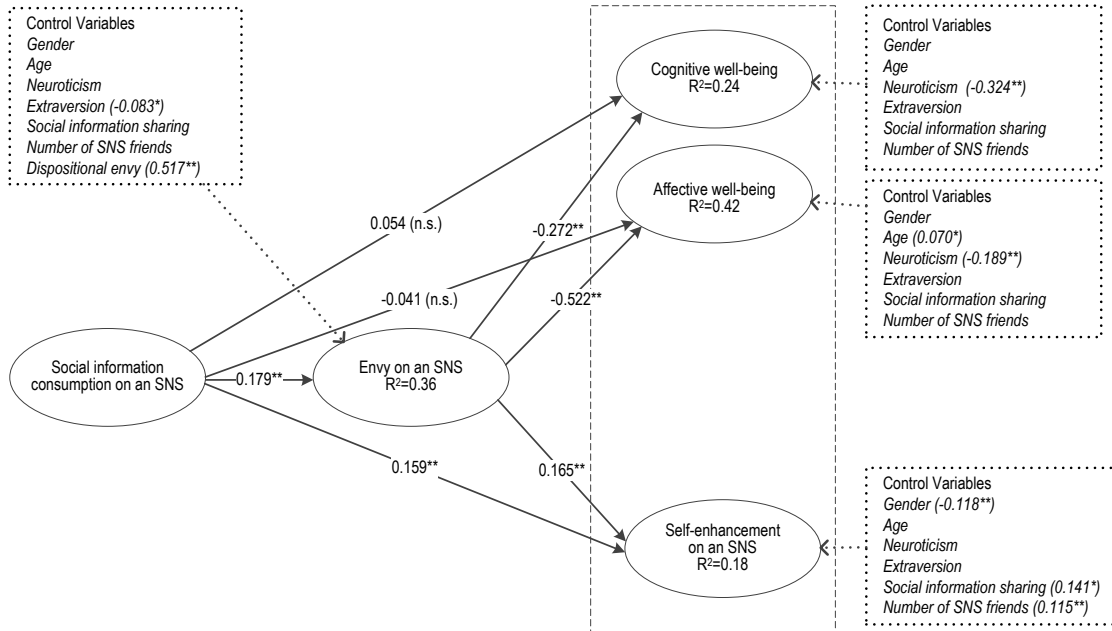

Note: The construct *cognitive well-being* was operationalized as “*satisfaction with life*”; the construct *affective well-being* was operationalized as “*sadness on an SNS*” (items were reversed prior to evaluation).

\*Significant at 5%; \*\*significant at 1% or lower; n.s. – not significant.

**Figure D.1:** Structural Model Including Direct Paths

## References

- Cohen-Charash Y (2009) Episodic envy. *J. Appl. Soc. Psych.* 39(9):2128-2173.
- Diener E, Emmons RA, Larsen RJ, Griffin S (1985) The satisfaction with life scale. *J. Personality Assessment* 49(1):71-75.
- Duffy MK, Scott KL, Shaw JD, Tepper BJ, Aquino K (2012) A social context model of envy and social undermining. *Acad. Management J.* 55(3):643-666.
- Duffy MK, Shaw JD (2000) The Salieri syndrome. *Small Group Res.* 31(1):3-23.
- Gino F, Pierce L (2009). Dishonesty in the name of equity. *Psych. Sci.* 20(9):1153-1160.
- Gold BT (1996) Enviousness and its relationship to maladjustment and psychopathology. *Personality Individual Differences* 21(3):311-321.
- Henseler J, Ringle C, Sarstedt M (2014) A new criterion for assessing discriminant validity in variance-based structural equation modeling. *J. Acad. Marketing Sci.* 1-21.
- Hill SE, Delpriori DJ, Vaughan PW (2011) The cognitive consequences of envy: Attention, memory, and self-regulatory depletion. *J. Personality and Soc. Psych.* 101(4):653-666.
- Kim J, Lee J-ER (2011) The Facebook paths to happiness: Effects of the number of Facebook friends and self-presentation on subjective well-being. *Cyberpsych. Behav. Social Networking* 14(6):359-364.
- Koroleva K, Krasnova H, Veltri NF, Günther O. (2011) It's all about networking! Empirical investigation of social capital formation on social network sites. *Proc. Internat. Conf. Inform. Systems (ICIS, Shanghai)*.
- Krasnova H, Spiekermann S, Koroleva K, Hildebrand T (2010) Online social networks: Why we disclose. *J. Inform Tech.* 25(2):109-125.
- Moran S, Schweitzer ME (2008) When better is worse: Envy and the use of deception. *Negotiation Conflict Management Res.* 1(1):3-29.
- Parrott WG, Smith RH (1993) Distinguishing the experiences of envy and jealousy. *J. Personality Soc. Psych.* 64(6):906-920.
- Rammstedt B, John OP (2007) Measuring personality in one minute or less: A 10-item short version of the Big Five inventory in English and German. *J. Res. Personality* 41(1):203-212.
- Salovey P, Rodin J (1984) Some antecedents and consequences of social-comparison jealousy. *J. Personality Soc. Psych.* 47(4):780-792.
- Salovey P, Rodin J (1988) Coping with envy and jealousy. *J. Soc. Clinical Psych.* 7(1):15-33.
- Schaubroeck J, Lam SS (2004) Comparing lots before and after: Promotion rejectees' invidious reactions to promotees. *Organ. Behav. Human Decision Processes* 94(1):33-47.
- Silver M, Sabini J (1978) The perception of envy. *Soc. Psych.* 41(2):105-117.
- Smith RH, Parrott WG, Diener EF, Hoyle RH, Kim SH (1999) Dispositional envy. *Personality Soc. Psych. Bull.* 25(8):1007-1020.
- Smith RH, Parrott WG, Ozer DL, Moniz A (1994) Subjective injustice and inferiority as predictors of hostile and depressive feelings in envy. *Personality Soc. Psych. Bull.* 20(6):705-711.
- Van De Ven N, Zeelenberg M, Pieters R (2009) Leveling up and down: The experiences of benign and malicious envy. *Emotion* 9(3):419-429.
- Van De Ven N, Zeelenberg M, Pieters R (2011) The envy premium in product evaluation. *J. Consumer Res.* 37(6):984-998.
- Vecchio RP (1995) It's not easy being green: Jealousy and envy in the workplace. Rowland K, Ferris G, ed. *Research in Personnel and Human Resources Management* (JAI Press, New York, NY, US), 201-244.
- Vecchio RP (2000) Negative emotion in the workplace: Employee jealousy and envy. *Internat. J. Stress Management* 7(3):161-179.
- Watson D, Clark L (1994) The PANAS-X: Manual for the positive and negative affect schedule-expanded form. Accessed March 9, 2015, at [http://ir.uiowa.edu/cgi/viewcontent.cgi?article=1011&context=psychology\\_pubs&sei-redir=1](http://ir.uiowa.edu/cgi/viewcontent.cgi?article=1011&context=psychology_pubs&sei-redir=1).
- Watson D, Clark LA, Tellegen A (1988) Development and validation of brief measures of positive and negative affect: The PANAS scales. *J. Personality Soc. Psych.* 54(6):1063-1070.

Yoshimura CG (2010) The experience and communication of envy among siblings, siblings-in-law, and spouses. *J. Social Personal Relationships* 27(8):1075-1088.
